# Genomic surveillance and improved molecular typing of *Bordetella pertussis* using wgMLST

Michael R. Weigand<sup>a#</sup>, Yanhui Peng<sup>a</sup>, Hannes Pouseele<sup>b</sup>, Dane Kania<sup>a\*</sup>, Katherine E. Bowden<sup>a†</sup>, Margaret M. Williams<sup>a</sup>, M. Lucia Tondella<sup>a</sup>

<sup>a</sup>Division of Bacterial Diseases, National Center for Immunization and Respiratory Diseases, Centers for Disease Control and Prevention, Atlanta, GA, USA.

<sup>b</sup>Applied Maths NV, Sint-Martens-Latem, Belgium.

Running Head: wgMLST scheme development for *Bordetella pertussis*

#Address correspondence to Michael R. Weigand, [mweigand@cdc.gov](mailto:mweigand@cdc.gov).

\*Present address: Dane Kania, Walt Disney Direct-to-Consumer & International Division, The Walt Disney Company, Burbank, California, USA

†Present address: Katherine E. Bowden, Division of Parasitic Diseases and Malaria, Center for Global Health, Centers for Disease Control and Prevention, Atlanta, GA, USA

Keywords: *Bordetella pertussis*, whooping cough, wgMLST, surveillance, genomics

19 ABSTRACT (233/250 words)

20 Multi-Locus Sequence Typing (MLST) provides allele-based characterization of bacterial pathogens in a  
 21 standardized framework. However, current MLST schemes for *Bordetella pertussis*, the causative agent  
 22 of whooping cough, seldom reveal diversity among the small number of gene targets and thereby fail  
 23 to delineate population structure. To improve discriminatory power of allele-based molecular typing of  
 24 *B. pertussis*, we have developed a whole-genome MLST (wgMLST) scheme from 214 reference-quality  
 25 genome assemblies. Iterative refinement and allele curation resulted in a scheme of 3,506 coding  
 26 sequences and covering 81.4% of the *B. pertussis* genome. This wgMLST scheme was further evaluated  
 27 with data from a convenience sample of 2,389 *B. pertussis* isolates sequenced on Illumina instruments,  
 28 including isolates from known outbreaks and epidemics previously characterized by existing molecular  
 29 assays, as well as replicates collected from individual patients. wgMLST demonstrated concordance  
 30 with whole-genome single nucleotide polymorphisms (SNP) profiles, accurately resolved outbreak and  
 31 sporadic cases in a retrospective comparison, and clustered replicate isolates collected from individual  
 32 patients during diagnostic confirmation. Additionally, a re-analysis of isolates from two statewide  
 33 epidemics using wgMLST reconstructed the population structures of circulating strains with increased  
 34 resolution, revealing new clusters of related cases. Comparison with an existing core-genome (cgMLST)  
 35 scheme highlights the genomic stability of this bacterium and forms the initial foundation for necessary  
 36 standardization. These results demonstrate the utility of wgMLST for improving *B. pertussis*  
 37 characterization and genomic surveillance during the current pertussis disease resurgence.

38

39

## 40 INTRODUCTION

41 Whooping cough (pertussis) is a respiratory disease with the highest rates of morbidity and  
 42 mortality in young infants that continues to resurge in the United States (US) and many other  
 43 countries. Vaccines against pertussis were introduced in the 1940s leading to dramatic reduction in  
 44 reported disease incidence. However, the switch to acellular formulations in the 1990s was followed by  
 45 increased reporting among all age groups in the decades since, despite high or increasing coverage  
 46 with pertussis containing vaccines among industrialized countries (1). While not fully understood,  
 47 resurgence likely results from multiple factors, including heightened awareness, expanded surveillance,  
 48 improved diagnostics, shifting transmission dynamics, and pathogen evolution (1-4). Waning  
 49 protection conferred by acellular vaccines is likely also responsible for increased disease among  
 50 vaccinated individuals (5, 6).

51 Increased pertussis in the US manifests in local outbreak clusters, but also in cyclical, statewide  
 52 and national epidemics.(7). Past molecular study of epidemics has been challenged by the low genetic  
 53 diversity of *B. pertussis*, frequently described as a ‘monomorphic’ pathogen (8). Traditional multi-locus  
 54 sequence typing (MLST) targeting select housekeeping genes provides very little discriminatory power  
 55 and isolates of *B. pertussis* are often genotyped according to alleles of key vaccine immunogen-  
 56 encoding genes, which resolve most isolates into only few sequence types (9-12). Quantifying specific  
 57 repeat content with multilocus variable-number tandem-repeat analysis (MLVA) similarly reveals few  
 58 discrete types (13). Alternatively, pulse-field gel electrophoresis (PFGE) has proven more useful for  
 59 molecular typing, owing to the structural plasticity of the *B. pertussis* chromosome (14-16), but lacks  
 60 throughput and standardization across laboratories (17, 18). The molecular study of poly-clonal  
 61 epidemics, as well as broader geographic or temporal dynamics, has required a time-consuming  
 62 combination of various methodologies as no single assay can sufficiently identify linked case clusters or

describe the molecular characteristics of circulating *B. pertussis* to guide prevention and control efforts (9, 16, 19, 20).

Applications of high-throughput sequencing have transformed public health by exploiting the profound resolution of pathogen genomics for effective investigation and surveillance of infectious disease (21-24). A number of recent whole-genome sequencing (WGS) analyses of circulating *B. pertussis* have successfully reconstructed the accumulation of single nucleotide polymorphisms (SNPs) to reveal the bacterium's population structure, geographic dispersion, and phylogenetic history with new depth (3, 25-29). However, allele-based molecular fingerprints may provide a more viable implementation of genome-based strain typing that can be standardized for routine use in public health laboratories (30-32). Whole-genome MLST (wgMLST) schemes, which capture the full complement of protein-coding genes in the genome, have been successfully applied to microbial pathogens for molecular epidemiology and food source attribution (22, 31, 33). More restrictive core-genome MLST (cgMLST) schemes, which evaluate only highly conserved genes, have also been implemented, including for *B. pertussis* (22, 34).

A growing number of recent *B. pertussis* clinical isolates recovered worldwide have been sequenced, including many closed assemblies. Here we leverage a collection of annotated, reference-quality genome assemblies to develop a standardized genome-based *B. pertussis* strain typing system using wgMLST and evaluate its performance with 2,389 sequenced isolates, primarily recovered from US pertussis cases. The curated scheme includes 3,506 protein-coding gene sequences, covering 81.4% of the average *B. pertussis* genome, and reproduced the population structure concordant with SNPs in retrospective analyses. These results highlight that the genomic stability of this bacterium perhaps makes wgMLST well suited for routine genome-based strain typing by public health institutions and pertussis researchers.

86

## 87 RESULTS

### 88 Locus curation

89         The wgMLST scheme was developed from the protein-coding genes predicted in closed,  
 90 reference-quality genome assemblies from 214 *B. pertussis* isolates in the CDC collection combined  
 91 with 11 publicly available genome sequences (TABLE S1). All multi-copy genes, paralogs, and IS-  
 92 element transposases were excluded resulting in 3,681 orthologous loci captured in the initial version,  
 93 the majority of which exhibited one allele. Each locus was evaluated with a larger set of raw  
 94 sequencing reads to identify any systematic errors in allele calling due to either coding sequence (CDS)  
 95 disruption (i.e., indels, gene truncations) or non-ACGT bases (i.e., Ns), as determined in BioNumerics.  
 96 Locus reliability was further evaluated by confirming matching allele calls in sequencing reads from  
 97 isolates which were independently confirmed to differ by  $\leq 1$  SNP using kSNP. The whole process of  
 98 locus curation, described with detail in the methods, was repeated twice and removed 175  
 99 problematic loci. The final scheme included 3,506 loci, covering  $> 3.3$  Mb (81.4%) of the *B. pertussis*  
 100 genome and an average 76.8% of protein-coding nucleotides (FIGURE 1). Details of each locus are  
 101 available in DATASET S1.

102

### 103 Performance testing

104         The process of allele calling in BioNumerics combines independent read mapping against a  
 105 database (assembly-free, AF) and reference alignment to *de novo* assemblies (assembly-based, AB) to  
 106 produce consensus allele calls. Performance was assessed across various metrics using sequencing

reads from 2,389 isolates to determine potential variations in allele calling due to instruments, read lengths, coverage depth, or average read quality. Assembly quality proved a good indicator of allele calling, regardless of sequencing instrument or format, as better assemblies yielded more consensus allele calls (FIGURE S1). Read lengths influenced allele call performance more than sequencing instrument likely due to improved assembly as seen with 250 bp reads from either the MiSeq or HiSeq (FIGURE S1). Accordingly, decreased allele calling primarily resulted from non-ACGT errors that corresponded to the number of ambiguous bases in the contigs, further illustrating the dependence on *de novo* assembly (FIGURE S1, FIGURE S2). Failed allele calling due to CDS disruption did not depend on sequencing instrument or read length but rather reflected the known accumulation of pseudogenes present in *B. pertussis* genomes (35) (FIGURE S1, FIGURE S2). Locus-centric assessment of allele calling also indicated that the highest failure rates were due to CDS disruption in a small set of frequent pseudogenes while others were comparably sporadic. Based on these results, a minimum cutoff of 3,000 consensus allele calls was used for all subsequent analyses.

Allele profile differences among the 2,239 isolates with at least 3,000 allele calls were compared to pairwise SNPs distances predicted independently with kSNP to assess agreement between the two approaches for sequence-based strain typing. As expected, there was strong concordance between pairwise allele and pairwise SNP distances (FIGURE 2). Most sequenced isolates of *B. pertussis* differed by <100 SNPs but exhibited more allelic differences due to variations not linked to single base substitutions, which are not detectable with kSNP.

## Reproducibility testing

128 To assess allele calling reproducibility and determine a minimum coverage depth cut-off, 10  
 129 sequencing read sets were randomly subsampled at seven coverage depths (9x, 14x, 21x, 31x, 46x, 70x,  
 130 105x), with five replicates. Each subsample was imported into BioNumerics and the total number of  
 131 consensus allele calls, as well as their accuracy compared to the full read set, were compared across  
 132 replicates. The total number of consensus allele calls remained above 3,000 for most replicates with  
 133 average coverage depths >25x before dropping quickly (FIGURE 3A, FIGURE S4). As coverage decreased  
 134 the consensus allele calls remained accurate, even as the total number of calls declined, and errors  
 135 were only observed in two replicates at 9x depth (FIGURE 3B). Both errors were traced back to a single  
 136 miscalled nucleotide in their respective loci. A minimum cut-off for average sequencing coverage depth  
 137 was set at 30x for all subsequent analyses.

138 Consistency among biological replicates was also evaluated using a collection of multiple  
 139 isolates recovered from 152 individual patients. Select participating surveillance laboratories pick ‘sets’  
 140 of colonies (average = 5; range = 2-7) during culture confirmation and submission to CDC for  
 141 characterization, including whole-genome sequencing (FIGURE S4). Sequence variation among isolates  
 142 within each set was quantified as both SNPs and alleles. While 49 sets exhibited no differences by  
 143 either measure, many sets include 1 SNP and pairwise distances up to 5 SNPs or 12 alleles were  
 144 observed (FIGURE 4). Some allele differences resulted from mutations other than single base  
 145 substitutions, such as indels.

146 Taken together, these replicates indicate that allele calling results are reproducible and a  
 147 minimum cut-off for sequencing depth was set at 30x for all subsequent analyses. Allelic and SNP  
 148 variation detected within replicate isolate sets from individual patients suggests that genetic  
 149 diversification occurs during infection. Therefore, the resolution of outbreak clustering may be limited

to approximately 2 allele differences as most cases are represented by a single isolate and results could vary depending on which colony is selected during laboratory isolation.

### Retrospective outbreak cluster detection

To test the utility of the wgMLST scheme for studying the molecular epidemiology of pertussis, 12 isolates from epidemiologically linked cases associated with an outbreak occurring at a high school during a two-month period in 2016 were characterized. The case isolates were compared to 83 contemporaneous, sporadic isolates, which together represented 22% of cases reported from the surveillance catchment area that included the outbreak. The 12 outbreak cases shared an identical allele profile and were discretely clustered in a minimum spanning tree calculated from 157 variable loci (FIGURE 5). Comparing allele profiles also identified potential links to 3 case isolates recovered from infants, two of whom were siblings, which pre-dated the outbreak. All other contemporaneous isolates differed from the outbreak cluster by at least 2 alleles, some forming clusters of their own, demonstrating the effectiveness of wgMLST to delineate linked cases and potentially complement epidemiological investigation of localized *B. pertussis* outbreaks.

### Population structure of statewide epidemics

Periods of increased disease have been reported across geographically defined regions (7), such as US states, and the test data here included sequenced *B. pertussis* isolates recovered from two such epidemics in Washington (9) and Vermont (36, 37). wgMLST revealed discrete population structures within each epidemic, confirming the polyclonal nature of each while identifying putative clusters of



transmission among linked cases in a minimum spanning tree calculated from 186 variable loci (FIGURE 6). Some of the genotypes present during the epidemic were also detected among surveillance isolates collected after the epidemics. Combining the isolates from both state epidemics further confirmed that each included circulation of common genotypes, despite >3700 km of physical separation (FIGURE 6).

#### Comparison to Institute Pasteur cgMLST scheme

A similar core genome MLST (cgMLST) scheme for *B. pertussis* was recently developed at Institute Pasteur that includes 2,038 gene loci or 1.75 Mbp (42.7%) of the average *B. pertussis* genome (34). The overlapping gene content shared between that cgMLST scheme and the wgMLST scheme here was determined by reciprocal BLASTn alignment. The two schemes shared 1822 common loci, defined as >95% nucleotide sequence identity and >90% length overlap (FIGURE 7). Some loci in each scheme could not be directly linked, likely because the annotated genome inputs used for developing the two schemes relied on different gene prediction algorithms. Relaxing the minimum length overlap allowed matching an additional 108 shared loci. However, some predicted protein-coding gene loci in one scheme were split into two smaller genes in the other loci. After accounting for these gene prediction artefacts, there were 1583 unique wgMLST (45.2%) and 108 unique cgMLST (5.3%) loci that could not be matched (FIGURE 7). Thirty-three of these cgMLST loci did match predicted CDS in the input genomes here but were removed from the wgMLST scheme during curation. Many others aligned to predicted pseudogenes, all of which were excluded from the wgMLST scheme. Identified overlaps and unique gene loci are detailed in DATASET S1.

The resolution of cgMLST, implemented within BioNumerics to ensure consistent allele calling methodology, was tested using the same collection of high school outbreak and sporadic surveillance

isolates above. A minimum spanning tree calculated from 76 polymorphic cgMLST loci (FIGURE 8) exhibited a similar topology to that determined using wgMLST (FIGURE 5) with subtle differences, as expected. However, cgMLST clustered the 12 outbreak isolates with an additional three surveillance isolates that differed by up to seven alleles according to wgMLST. The two schemes were further compared using pairwise allele distances among a subset of 379 sequenced isolates selected to represent the phylogenetic breadth of the larger collection. Similarly, the schemes were concordant but wgMLST identified more allelic differences among isolates reflecting the added resolution provided by the additional loci, as expected (FIGURE S5). The difference in resolution was particularly evident at shorter distances (Figure S5C) relevant for pertussis outbreak clusters delineation, consistent with observed clustering in the retrospective analysis (e.g. Figure 8).

## DISCUSSION

In this study, we present the development and validation of a wgMLST scheme for *B. pertussis*, the primary agent of whooping cough. Traditional molecular methods provide little support for pertussis epidemiology and multiple assays used in combination have been needed to identify linkages among contemporaneous cases with only limited resolution (9, 12, 16). Through retrospective analyses, the results here demonstrate the utility of wgMLST for strain characterization using a single, genome-based assay within a standardized platform suitable for local and state public health laboratories. Widespread implementation of WGS and wgMLST for clinical *B. pertussis* can promote genomic surveillance, enhance understanding of the epidemiology of pertussis, and further empower study of pertussis resurgence.

214 The species *B. pertussis* has been frequently described as ‘monomorphic’ for its limited genome  
 215 sequence diversity and nearly fixed accessory gene content (8). While such characteristics have made  
 216 the traditional molecular characterization of clinical isolates challenging, the design approach of gene-  
 217 by-gene allele typing may benefit from the large core fraction and lack of detectible recombination in  
 218 the *B. pertussis* population. As a result, the wgMLST scheme developed here captures the majority of  
 219 protein-coding nucleotides not associated with insertion sequence element (ISE) transposases, of  
 220 which the *B. pertussis* genome harbors >250 (~7% of all CDS). Proliferation of these ISEs, particularly  
 221 the >240 copies of IS481, facilitated genome reduction during the speciation of *B. pertussis* from the  
 222 closely related ‘Classic Bordetellae’ (35, 38, 39). Such repetitive sequences also obstruct draft genome  
 223 assembly from short-read sequencing data, which critically influences allele call performance by  
 224 bioinformatic tools like BioNumerics when using read formats of 100 bp or less, regardless of average  
 225 sequencing depth or read quality. Accordingly, appropriate wgMLST scheme curation considers the  
 226 impact of both technical variables and microbe-specific biological idiosyncrasies, such as pseudogenes,  
 227 repeat polymorphisms, and ISEs in the case of *B. pertussis*, as well as their intersection.

228 The economization of high-throughput sequencing and resolution of genome-based molecular  
 229 typing has revolutionized characterization of numerous microbes associated with animal and human  
 230 disease (21, 23). Successfully translating these technologies into application for molecular (genomic)  
 231 epidemiology requires both standardization and portability. Perhaps the most successful example is  
 232 the widespread implementation of wgMLST, supplanting PFGE, for foodborne pathogen surveillance  
 233 (22, 40). Reported SNP phylogenetic reconstructions of *B. pertussis* clinical isolates have provided clear  
 234 delineation of branching lineages and divergence from vaccine reference strains within the recent  
 235 genomic history of *B. pertussis* (3, 15, 25). The data here highlight that wgMLST may provide additional

resolution by capturing allele variants not resulting from single base substitutions and, therefore, provide a powerful single assay for strain typing and molecular epidemiology of *B. pertussis*.

A similar cgMLST scheme for *B. pertussis* was recently developed and reported by Institut Pasteur (34). That scheme targets genes present in nearly all isolates ('core') in contrast to the larger wgMLST scheme here. Comparing the two schemes revealed that they differed beyond the number of loci and the cgMLST scheme was not simply a subset of wgMLST. Differences in input data and gene prediction algorithms used to develop the two schemes produced CDS discrepancies, highlighting subtle differences in popular gene finding approaches (41, 42). Accurate locus detection and subsequent allele calling, not just in BioNumerics, benefits from conserved start and stop codon positions (31). The comparison here suggests that wgMLST does provide additional resolution in pairwise measurements, particularly among closely related *B. pertussis* isolates separated by distances relevant for outbreak cluster delineation. Broad application of allele-based typing for molecular epidemiology and genomic surveillance would benefit from scheme harmonization, which will require careful modification of loci in both schemes, starting with those which overlap only under relaxed alignment parameters. Such efforts would surely be rewarded with a more thorough database of observed, circulating allelic variation for use by varied public health institutions and researchers, including those focused on developing future pertussis vaccines.

An allele-based approach to strain characterization cannot resolve chromosome structure variation, which provides a significant source of genomic diversity among circulating *B. pertussis* (14, 15, 43). Genomes of *B. pertussis* clinical isolates exhibit frequent rearrangement, most often as large inversions, but more recently also amplifications (28, 44). It remains unclear whether such structural forms of genomic variation yield phenotypes, such as varied transmission or clinical disease

presentation, but observed patterns among circulating isolates compared to common reference strains suggests they are under selection (45). These types of genomic structural features remain largely intractable, particularly by short-read sequencing platforms widespread in public health settings. However, the example retrospective datasets presented here, and previously (34), demonstrate the utility of allele-based strain typing for linking cases based on inferred ancestral relationships among recovered *B. pertussis* isolates. Previous comparative study of rearrangement variation among closed genome assemblies has revealed that many chromosome structures are phylogenetically restricted (15, 45), suggesting that reconstructing *B. pertussis* populations from polymorphic SNPs, or alleles, still captures meaningful relationships among case isolates.

Perhaps the largest barrier to widespread implementation of wgMLST (or cgMLST) for genomic surveillance of *B. pertussis* is the continued decline of diagnostic culture. All the data included here were derived from whole-genome sequencing of cultured isolates but on average fewer than 3.5% of US cases captured annually by the Enhanced Pertussis Surveillance/Emerging Infections Program (EPS) yield isolates (46). In principle, wgMLST can be applied to data derived from direct – ‘metagenomic’ – sequencing of clinical nasopharyngeal specimens, but will likely require careful modification. Limited observation of allelic variation among replicate isolates here highlight that application of wgMLST to direct sequencing data will need to evaluate polymorphic loci. For example, at least some replicate isolates recovered from individual patients differed by more alleles than were used to delineate a retrospective high school outbreak. Defining cluster cut-offs for sequence-based typing is a common problem (22, 30, 32), made more challenging by within-patient sequence variability of an organism with so little diversity. Solving these challenges and successful interoperability of wgMLST and direct sequencing is likely the only way for this, or any other method of genomic surveillance, to advance the

study of pertussis resurgence. Hopefully the result facilitates production of sufficient datasets to enable large-scale, integrated analysis of genomic and epidemiological data.

## MATERIALS AND METHODS

### Strain selection

The Centers for Disease Control and Prevention's (CDC) collection includes US *B. pertussis* isolates gathered through routine surveillance and during outbreaks. In total, sequence data from a convenience sample of 2,389 isolate genomes were included in the current study based on availability and most were selected for sequencing as part of previous studies (Table S2). Many isolates were obtained through the Enhanced Pertussis Surveillance/Emerging Infection Program Network (EPS) (46), including sets of 2-7 replicate isolates (average = 5) recovered from 153 patients during diagnostic culture confirmation.

### Genomic DNA preparation and sequencing

Isolates were cultured on Regan-Lowe agar without cephalexin for 72 h at 37 C. Genomic DNA isolation and purification was performed using the Gentra Puregene Yeast/Bacteria Kit (Qiagen; Valencia, CA) with slight modification (36). Briefly, two aliquots of approximately  $1 \times 10^9$  bacterial cells were harvested and resuspended in 500 uL of 0.85% sterile saline and then pelleted by centrifugation for 1 min at 16,000 x g. Recovered genomic DNA was resuspended in 100 uL of DNA Hydration Solution. Aliquots were quantified using a Nanodrop 2000 (Thermo Fisher Scientific Inc.; Wilmington, DE). Whole genome shotgun libraries were prepared using the NEB Ultra Library Prep kit (New England Biolabs; Ipswich, MA) for sequencing on either the MiSeq or HiSeq (Illumina; San Diego, CA).

Sequencing reads from 10 isolates were randomly selected and subsampled without replacement yielding 5 replicate samples at each of 7 coverage depths (9x, 14x, 21x, 31x, 46x, 70x, 105x).

### wgMLST scheme design

The initial wgMLST scheme was developed from all protein-coding genes predicted in closed, reference-quality genome assemblies from 214 *B. pertussis* isolates (TABLE S1). Multi-copy genes and paralogs (e.g. ISE transposases) with > 95% sequence identity were detected and removed, excluding 240-260 CDS (6.5%) per genome. The remaining CDS were clustered into 3,681 orthologous loci. Each locus was further evaluated based on consensus allele call frequency and errors using custom scripts from Applied Maths, as well as manual inspection of allele alignments in BioNumerics. Loci were manually removed from the scheme based on criteria such as low frequency, low-complexity sequence repeats, homopolymeric tracts, length discrepancy, or variable allele calling between replicates. The process of locus curation was repeated twice, first with initial input set of 214 genomes and then with a larger collection of 614 isolates, leaving 3,506 loci in the final scheme.

### wgMLST allele calling and strain comparison

Allele calling was performed with the BioNumerics (v7.6.3) Calculation Engine. Imported sequencing reads were quality trimmed and filtered (min average read quality = 25, min read tail quality score = 15, min read length = 35 bp) before *de novo* assembly using Spades v3.7.1 (careful mode, min contig length = 300 bp) (47). Consensus allele calls were derived from the combination of read mapping (assembly-free, AF; k = 35; min coverage = 3x, min forward = 1x, min reverse = 1x) and

reference alignment to the assembled contigs with discontinuous MegaBLAST (assembly-based, AB; k = 11, min similarity = 95%, allow gapped alignment, start/stop codon hunting off). Allele pattern comparisons were performed by selecting all sequencing read sets with at least 3,000 consensus allele calls and filtering out any monomorphic loci. Pairwise distances were determined using a simple cluster analysis based on categorical differences and UPGMA hierarchical clustering in BioNumerics. Minimum-spanning trees were calculated in BioNumerics using the advanced cluster analysis for categorical data.

### SNP detection

SNP variation among sequenced isolate genomes was determined with the exported *de novo* assemblies from BioNumerics using kSNP3 with k = 23 (48). Pairwise distances were calculated from all variable SNPs shared between each pair of sequenced isolates.

### Comparison to Institute Pasteur's cgMLST scheme

The cgMLST scheme and allele definitions developed at Institute Pasteur (34) were kindly provided by Sylvain Brisse and Valérie Bouchez. Ortholog matching between the cgMLST and wgMLST schemes was performed by reciprocal best-match alignment using BLASTn (minimum 95% identity and 90% length match). Unmatched loci were further compared to identify overlapping sequence content with relaxed alignment parameters (minimum 90% identity and 50% length match).

The cgMLST scheme was loaded into a local database in BioNumerics and allele calling was performed with select isolates using the same parameters as indicated above for wgMLST. A



representative subset of sequenced isolates was derived from the collection of 2,039 read sets with at least 3,000 wgMLST consensus allele calls by clustering isolates with 0-1 pairwise SNPs using mcl (49). One isolate was selected from each of the resulting clusters and combined with all unclustered (unique) isolates, as well as isolates from a retrospective high school outbreak and replicates from individual patients, into a dataset of 379 isolates representing the phylogenetic breath of the larger collection.

### Data availability

The whole-genome shotgun sequences are available from the NCBI Sequence Read Archive, organized under BioProject accession number PRJNA279196.

### **Acknowledgements**

We thank Pam Cassiday and Tami Skoff (CDC), Lingzi Xiaoli and Matt Cole (IHRC, Inc.), the CDC Biotechnology Core Facilities Branch Genome Sequencing Laboratory, The Enhanced Pertussis Surveillance/Emerging Infection Program Network, and Sylvain Brisse and Valérie Bouchez (Institut Pasteur).

This work was made possible through support from CDC's Advanced Molecular Detection (AMD) program.

The findings and conclusions in this report are those of the authors and do not necessarily represent the official position of the Centers for Disease Control and Prevention. Use of trade names and

365 commercial sources is for identification only and does not imply endorsement by the Centers for  
366 Disease Control and Prevention, the Public Health Service, or the U.S. Department of Health and  
367 Human Services.

368

## 369 REFERENCES

- 370 1. Clark TA. 2014. Changing pertussis epidemiology: everything old is new again. *J Infect Dis* 209:978-81.
- 371 2. Ausiello CM, Cassone A. 2014. Acellular pertussis vaccines and pertussis resurgence: revise or replace?
- 372 *MBio* 5:e01339-14.
- 373 3. Bart MJ, Zeddeman A, van der Heide HG, Heuvelman K, van Gent M, Mooi FR. 2014. Complete Genome
- 374 Sequences of *Bordetella pertussis* Isolates B1917 and B1920, Representing Two Predominant Global
- 375 Lineages. *Genome Announc* 2.
- 376 4. Bento AI, King AA, Rohani P. 2018. A simulation study on the relative role of age groups under differing
- 377 pertussis transmission scenarios. doi:10.1101/247007 %J bioRxiv:247007.
- 378 5. Burdin N, Handy LK, Plotkin SA. 2017. What Is Wrong with Pertussis Vaccine Immunity?: The Problem of
- 379 Waning Effectiveness of Pertussis Vaccines. 9.
- 380 6. Warfel JM, Edwards KM. 2015. Pertussis vaccines and the challenge of inducing durable immunity. *Curr*
- 381 *Opin Immunol* 35:48-54.
- 382 7. Skoff TH, Hadler S, Hariri S. 2019. The Epidemiology of Nationally Reported Pertussis in the United
- 383 States, 2000–2016. *Clin Infect Dis* 68:1634-1640.
- 384 8. Mooi FR. 2010. *Bordetella pertussis* and vaccination: the persistence of a genetically monomorphic
- 385 pathogen. *Infection Genetics and Evolution* 10:36-49.
- 386 9. Bowden KE, Williams MM, Cassiday PK, Milton A, Pawloski L, Harrison M, Martin SW, Meyer S, Qin X,
- 387 DeBolt C, Tasslimi A, Syed N, Sorrell R, Tran M, Hiatt B, Tondella ML. 2014. Molecular epidemiology of
- 388 the pertussis epidemic in Washington State in 2012. *J Clin Microbiol* 52:3549-57.
- 389 10. Diavatopoulos DA, Cummings CA, Schouls LM, Brinig MM, Relman DA, Mooi FR. 2005. *Bordetella*
- 390 *pertussis*, the causative agent of whooping cough, evolved from a distinct, human-associated lineage of
- 391 *B. bronchiseptica*. *PLoS Pathog* 1:e45.
- 392 11. van Loo IHM, Heuvelman KJ, King AJ, Mooi FR. 2002. Multilocus Sequence Typing of *Bordetella pertussis*
- 393 Based on Surface Protein Genes. *J Clin Microbiol* 40:1994.
- 394 12. Barkoff A-M, He Q. 2019. Molecular Epidemiology of *Bordetella pertussis*, p 19-33. *In* Fedele G, Ausiello
- 395 CM (ed), *Pertussis Infection and Vaccines: Advances in Microbiology, Infectious Diseases and Public*
- 396 *Health Volume 12* doi:10.1007/5584\_2019\_402. Springer International Publishing, Cham.
- 397 13. Schouls LM, van der Heide HG, Vauterin L, Vauterin P, Mooi FR. 2004. Multiple-locus variable-number
- 398 tandem repeat analysis of Dutch *Bordetella pertussis* strains reveals rapid genetic changes with clonal
- 399 expansion during the late 1990s. *J Bacteriol* 186:5496-505.
- 400 14. Stibitz S, Yang MS. 1999. Genomic plasticity in natural populations of *Bordetella pertussis*. *J Bacteriol*
- 401 181:5512-5.
- 402 15. Weigand MR, Peng Y, Loparev V, Batra D, Bowden KE, Burroughs M, Cassiday PK, Davis JK, Johnson T,
- 403 Juieng P, Knipe K, Mathis MH, Pruitt AM, Rowe L, Sheth M, Tondella ML, Williams MM. 2017. The history
- 404 of *Bordetella pertussis* genome evolution includes structural rearrangement. *J Bacteriol* 199:e00806-16.
- 405 16. Advani A, Van der Heide HG, Hallander HO, Mooi FR. 2009. Analysis of Swedish *Bordetella pertussis*
- 406 isolates with three typing methods: characterization of an epidemic lineage. *J Microbiol Methods*
- 407 78:297-301.
- 408 17. Cassiday PK, Skoff TH, Jawahir S, Tondella ML. 2016. Changes in Predominance of Pulsed-Field Gel
- 409 Electrophoresis Profiles of *Bordetella pertussis* Isolates, United States, 2000-2012. *Emerg Infect Dis*
- 410 22:442-8.
- 411 18. Barkoff A-M, Mertsola J, Pierard D, Dalby T, Hoegh SV, Guillot S, Stefanelli P, van Gent M, Berbers G,
- 412 Vestrheim DF, Greve-Isdahl M, Wehlin L, Ljungman M, Fry NK, Markey K, Auranen K, He Q. 2018.
- 413 Surveillance of Circulating *Bordetella pertussis* Strains in Europe during 1998 to 2015. *J Clin Microbiol*
- 414 56:e01998-17.
- 415 19. Mir-Cros A, Moreno-Mingorance A, Martín-Gómez MT, Codina G, Cornejo-Sánchez T, Rajadell M, Van
- 416 Ezzo D, Rodrigo C, Campins M, Jané M, Pumarola T, Fàbrega A, González-López JJ. 2019. Population

- 417 dynamics and antigenic drift of *Bordetella pertussis* following whole cell vaccine replacement, Barcelona,  
418 Spain, 1986–2015. *Emerging Microbes & Infections* 8:1711-1720.
- 419 20. Rocha EL, Leite D, Camargo CH, Martins LM, Silva RSN, Martins VP, Campos TA. 2017. The  
420 characterization of *Bordetella pertussis* strains isolated in the Central-Western region of Brazil suggests  
421 the selection of a specific genetic profile during 2012–2014 outbreaks. *Epidemiol Infect* 145:1392-1397.
- 422 21. Armstrong GL, MacCannell DR, Taylor J, Carleton HA, Neuhaus EB, Bradbury RS, Posey JE, Gwinn M.  
423 2019. Pathogen Genomics in Public Health. *N Engl J Med* 381:2569-2580.
- 424 22. Besser JM, Carleton HA, Trees E, Stroika SG, Hise K, Wise M, Gerner-Smidt P. 2019. Interpretation of  
425 Whole-Genome Sequencing for Enteric Disease Surveillance and Outbreak Investigation. *Foodborne*  
426 *Pathog Dis* 16:504-512.
- 427 23. Black A, MacCannell DR, Sibley TR, Bedford T. 2020. Ten recommendations for supporting open  
428 pathogen genomic analysis in public health. *Nat Med* 26:832-841.
- 429 24. MacCannell D. 2019. Platforms and Analytical Tools Used in Nucleic Acid Sequence-Based Microbial  
430 Genotyping Procedures\*. 7.
- 431 25. Octavia S, Maharjan RP, Sintchenko V, Stevenson G, Reeves PR, Gilbert GL, Lan R. 2011. Insight into  
432 evolution of *Bordetella pertussis* from comparative genomic analysis: evidence of vaccine-driven  
433 selection. *Mol Biol Evol* 28:707-15.
- 434 26. van Gent M, Bart MJ, van der Heide HG, Heuvelman KJ, Mooi FR. 2012. Small mutations in *Bordetella*  
435 *pertussis* are associated with selective sweeps. *PLoS One* 7:e46407.
- 436 27. Weigand MR, Peng Y, Cassidy PK, Loparev VN, Johnson T, Juieng P, Nazarian EJ, Weening K, Tondella  
437 ML, Williams MM. 2017. Complete genome sequences of *Bordetella pertussis* isolates with novel  
438 pertactin-deficient deletions. *Genome Announcements* 5.
- 439 28. Weigand MR, Williams MM, Peng Y, Kania D, Pawloski LC, Tondella ML, Group CPW. 2018. Genomic  
440 survey of US *B. pertussis* diversity. *Emerg Infect Dis* 25: 780–783.
- 441 29. Xu Y, Liu B, Grondahl-Yli-Hannuksila K, Tan Y, Feng L, Kallonen T, Wang L, Peng D, He Q, Wang L, Zhang S.  
442 2015. Whole-genome sequencing reveals the effect of vaccination on the evolution of *Bordetella*  
443 *pertussis*. *Sci Rep* 5:12888.
- 444 30. Moura A, Criscuolo A, Pouseele H, Maury MM, Leclercq A, Tarr C, Björkman JT, Dallman T, Reimer A,  
445 Enouf V, Larssonneur E, Carleton H, Bracq-Dieye H, Katz LS, Jones L, Touchon M, Tourdjman M, Walker M,  
446 Stroika S, Cantinelli T, Chenal-Francisque V, Kucerova Z, Rocha EPC, Nadon C, Grant K, Nielsen EM, Pot B,  
447 Gerner-Smidt P, Lecuit M, Brisse S. 2016. Whole genome-based population biology and epidemiological  
448 surveillance of *Listeria monocytogenes*. *Nature Microbiology* 2:16185.
- 449 31. Jolley KA, Maiden MC. 2014. Using multilocus sequence typing to study bacterial variation: prospects in  
450 the genomic era. *Future Microbiol* 9:623-30.
- 451 32. Schürch AC, Arredondo-Alonso S, Willems RJJ, Goering RV. 2018. Whole genome sequencing options for  
452 bacterial strain typing and epidemiologic analysis based on single nucleotide polymorphism versus gene-  
453 by-gene-based approaches. *Clin Microbiol Infect* 24:350-354.
- 454 33. Besser J, Carleton HA, Gerner-Smidt P, Lindsey RL, Trees E. 2018. Next-generation sequencing  
455 technologies and their application to the study and control of bacterial infections. *Clinical microbiology*  
456 *and infection : the official publication of the European Society of Clinical Microbiology and Infectious*  
457 *Diseases* 24:335-341.
- 458 34. Bouchez V, Guglielmini J, Dazas M, Landier A, Toubiana J, Guillot S, Criscuolo A, Brisse S. 2018. Genomic  
459 Sequencing of *Bordetella pertussis* for Epidemiology and Global Surveillance of Whooping Cough.  
460 *Emerging Infectious Disease journal* 24:988.
- 461 35. Parkhill J, Sebahia M, Preston A, Murphy LD, Thomson N, Harris DE, Holden MT, Churcher CM, Bentley  
462 SD, Mungall KL, Cerdano-Tarraga AM, Temple L, James K, Harris B, Quail MA, Achtman M, Atkin R, Baker  
463 S, Basham D, Bason N, Cherevach I, Chillingworth T, Collins M, Cronin A, Davis P, Doggett J, Feltwell T,  
464 Goble A, Hamlin N, Hauser H, Holroyd S, Jagels K, Leather S, Moule S, Norberczak H, O'Neil S, Ormond D,  
465 Price C, Rabinowitsch E, Rutter S, Sanders M, Saunders D, Seeger K, Sharp S, Simmonds M, Skelton J,

- Squares R, Squares S, Stevens K, Unwin L, et al. 2003. Comparative analysis of the genome sequences of *Bordetella pertussis*, *Bordetella parapertussis* and *Bordetella bronchiseptica*. *Nat Genet* 35:32-40.
36. Bowden KE, Weigand MR, Peng Y, Cassiday PK, Sammons S, Knipe K, Rowe LA, Loparev V, Sheth M, Weening K, Tondella ML, Williams MM. 2016. Genome structural diversity among 31 *Bordetella pertussis* isolates from two recent U.S. whooping cough statewide epidemics. *mSphere* 1:e00036-16.
37. Martin SW, Pawloski L, Williams M, Weening K, DeBolt C, Qin X, Reynolds L, Kenyon C, Giambrone G, Kudish K, Miller L, Selvage D, Lee A, Skoff TH, Kamiya H, Cassiday PK, Tondella ML, Clark TA. 2015. Pertactin-negative *Bordetella pertussis* strains: evidence for a possible selective advantage. *Clin Infect Dis* 60:223-7.
38. Linz B, Ivanov YV, Preston A, Brinkac L, Parkhill J, Kim M, Harris SR, Goodfield LL, Fry NK, Gorringer AR, Nicholson TL, Register KB, Losada L, Harvill ET. 2016. Acquisition and loss of virulence-associated factors during genome evolution and speciation in three clades of *Bordetella* species. *BMC Genomics* 17:767.
39. Park J, Zhang Y, Buboltz AM, Zhang X, Schuster SC, Ahuja U, Liu M, Miller JF, Sebahia M, Bentley SD, Parkhill J, Harvill ET. 2012. Comparative genomics of the classical *Bordetella* subspecies: the evolution and exchange of virulence-associated diversity amongst closely related pathogens. *BMC Genomics* 13:545.
40. Nadon C, Van Walle I, Gerner-Smidt P, Campos J, Chinen I, Concepcion-Acevedo J, Gilpin B, Smith AM, Kam KM, Perez E, Trees E, Kubota K, Takkinen J, Nielsen EM, Carleton H, Panel F-NE. 2017. PulseNet International: Vision for the implementation of whole genome sequencing (WGS) for global food-borne disease surveillance. *22:30544*.
41. Stein L. 2001. Genome annotation: from sequence to biology. *Nature Reviews Genetics* 2:493-503.
42. Lomsadze A, Gemayel K, Tang S, Borodovsky M. 2018. Modeling leaderless transcription and atypical genes results in more accurate gene prediction in prokaryotes. *Genome Res* 28:1079-1089.
43. Weigand MR, Williams MM, Otero G. 2019. Temporal patterns of *Bordetella pertussis* genome sequence and structural evolution. In Rohai P, Scarpino SV (ed), *Pertussis: epidemiology, immunology, & evolution*. Oxford University Press.
44. Abrahams JS, Weigand MR, Ring N, MacArthur I, Peng S, Williams MM, Bready B, Catalano AP, Davis JR, Kaiser MD, Oliver JS, Sage JM, Bagby S, Tondella ML, Gorringer AR, Preston A. 2020. Duplications drive diversity in *Bordetella pertussis* on an underestimated scale. *bioRxiv* doi:10.1101/2020.02.06.937284:2020.02.06.937284.
45. Weigand MR, Peng Y, Batra D, Burroughs M, Davis JK, Knipe K, Loparev VN, Johnson T, Juieng P, Rowe LA, Sheth M, Tang K, Unoarumhi Y, Williams MM, Tondella ML. 2019. Conserved Patterns of Symmetric Inversion in the Genome Evolution of *Bordetella* Respiratory Pathogens. *mSystems* 4:e00702-19.
46. Skoff TH, Baumbach J, Cieslak PR. 2015. Tracking pertussis and evaluating control measures through Enhanced Pertussis Surveillance, Emerging Infections Program, United States. *Emerg Infect Dis* 21:1568-73.
47. Bankevich A, Nurk S, Antipov D, Gurevich AA, Dvorkin M, Kulikov AS, Lesin VM, Nikolenko SI, Pham S, Prjibelski AD, Pyshkin AV, Sirotkin AV, Vyahhi N, Tesler G, Alekseyev MA, Pevzner PA. 2012. SPAdes: A New Genome Assembly Algorithm and Its Applications to Single-Cell Sequencing. *J Comput Biol* 19:455-477.
48. Gardner SN, Slezak T, Hall BG. 2015. kSNP3.0: SNP detection and phylogenetic analysis of genomes without genome alignment or reference genome. *Bioinformatics* 31:2877-8.
49. Van Dongen S. 2008. Graph clustering via a discrete uncoupling process. *SIAM Journal on Matrix Analysis and Applications* 30:121-141.

## 511 FIGURE LEGENDS

512 Figure 1. wgMLST scheme statistics. (A) The scheme was developed from 214 complete genome  
513 assemblies and covered an average 84.5% of each genome, while the final scheme captured an  
514 average 76.8% of protein-coding nucleotides in a large collection of sequenced isolates. (B) The  
515 distribution of unique alleles observed at each locus shifted as incorporating additional isolates  
516 revealed more diverse allele sequences at many gene loci.

517 Figure 2. Concordance of pairwise distances. SNP and allele distances between all pairwise  
518 combinations of 2,389 sequenced isolates were concordant. Distances measured by wgMLST were  
519 consistently greater than measures of SNPs, reflecting the many types of sequence variation among  
520 the alleles. Distances are plotted as density according to the key and dotted lines indicate perfect  
521 correlation. Most isolates differed by < 200 alleles and a small number of very distant isolates  
522 resembled strain 18323 that differed from the majority by > 1000 alleles (inset).

523 Figure 3. Technical replicates from subsampled read sets. At decreasing coverage depths (9x, 14x, 21x,  
524 31x, 46x, 70x, 105x), replicated subsamples from select HiSeq and MiSeq read sets produced fewer  
525 consensus allele calls (A) but largely still made accurate allele calls compared to the full read set (B).  
526 Replicates for each read set are plotted separately in FIGURE S3.

527 Figure 4. Biological replicates from individual patients. Sets of replicate isolates recovered from  
528 surveillance cases during culture confirmation were frequently not all identical, with a maximum  
529 pairwise distance within the set often equaling 1-2 SNPs or alleles. Inset shows sets with <= 1 SNP or  
530 allele maximum distance.

531 Figure 5. Molecular epidemiology of a high school outbreak. A minimum spanning tree calculated from  
532 157 polymorphic loci clustered 12 case isolates from a high school outbreak, distinguishing them from

83 contemporaneous sporadic case isolates collected through routine surveillance in a retrospective comparison. Outbreak and sporadic case isolates are indicated according to the key. Node size indicates abundance and connecting lines are numbered according to allele distance.

Figure 6. Molecular epidemiology of state-wide epidemics. Minimum spanning trees calculated from 186 core, polymorphic loci among 832 case isolates recovered from WA and VT. Many genotypes were common among the two epidemics (A) and both WA (B) and VT (C) likely included multiple clusters of transmission. Epidemic and routine surveillance case isolates are indicated according to the key in each panel. Node size indicates abundance and connecting lines are weighted according to allele distance.

Figure 7. Gene content shared between the CDC wgMLST and Institute Pasteur cgMLST schemes. The two schemes shared 1822 orthologs and an additional 108 overlapping genes with varied lengths. Each scheme also included unique gene loci. Identified overlaps and unique gene loci are detailed in DATASET S1.

Figure 8. Typing resolution of cgMLST vs wgMLST. A minimum spanning tree from 76 polymorphic cgMLST loci clustered 12 case isolates from a high school outbreak with additional sporadic case isolates that were differentiated by wgMLST (inset). Outbreak and sporadic case isolates are indicated according to the key. Node size indicates abundance and connecting lines are numbered according to allele distance.

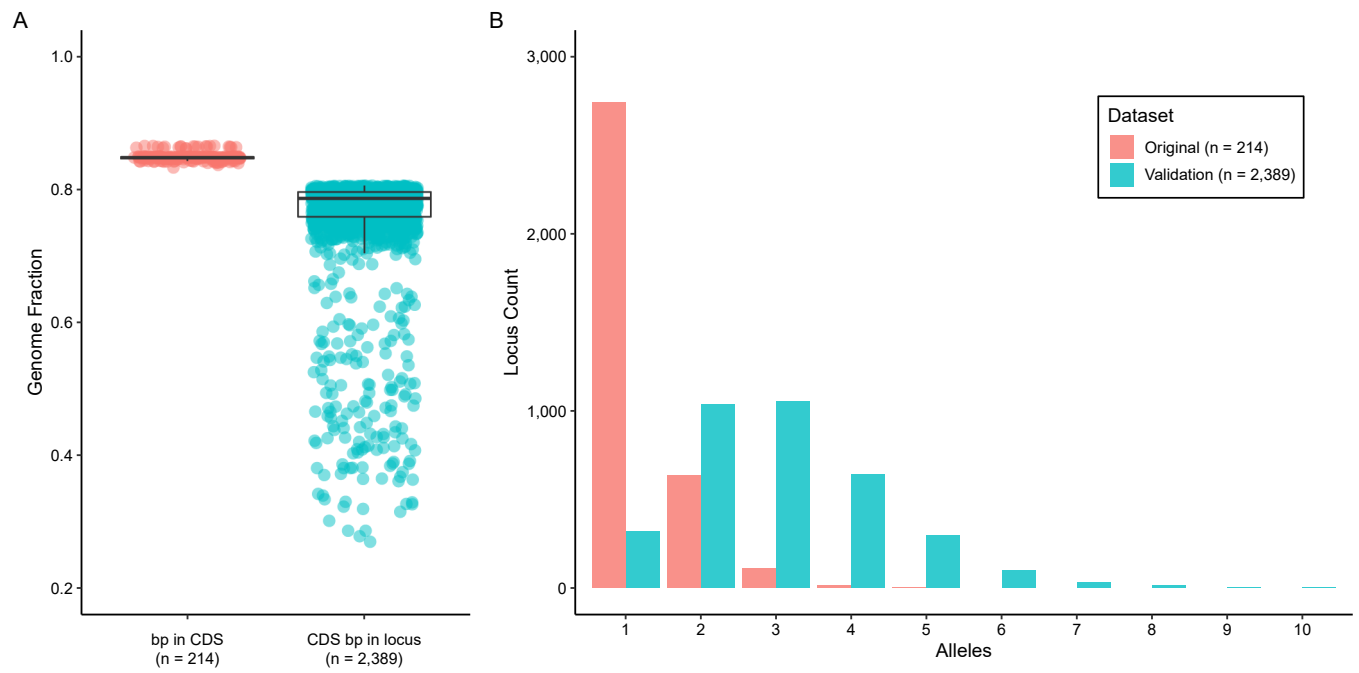

Figure 1.



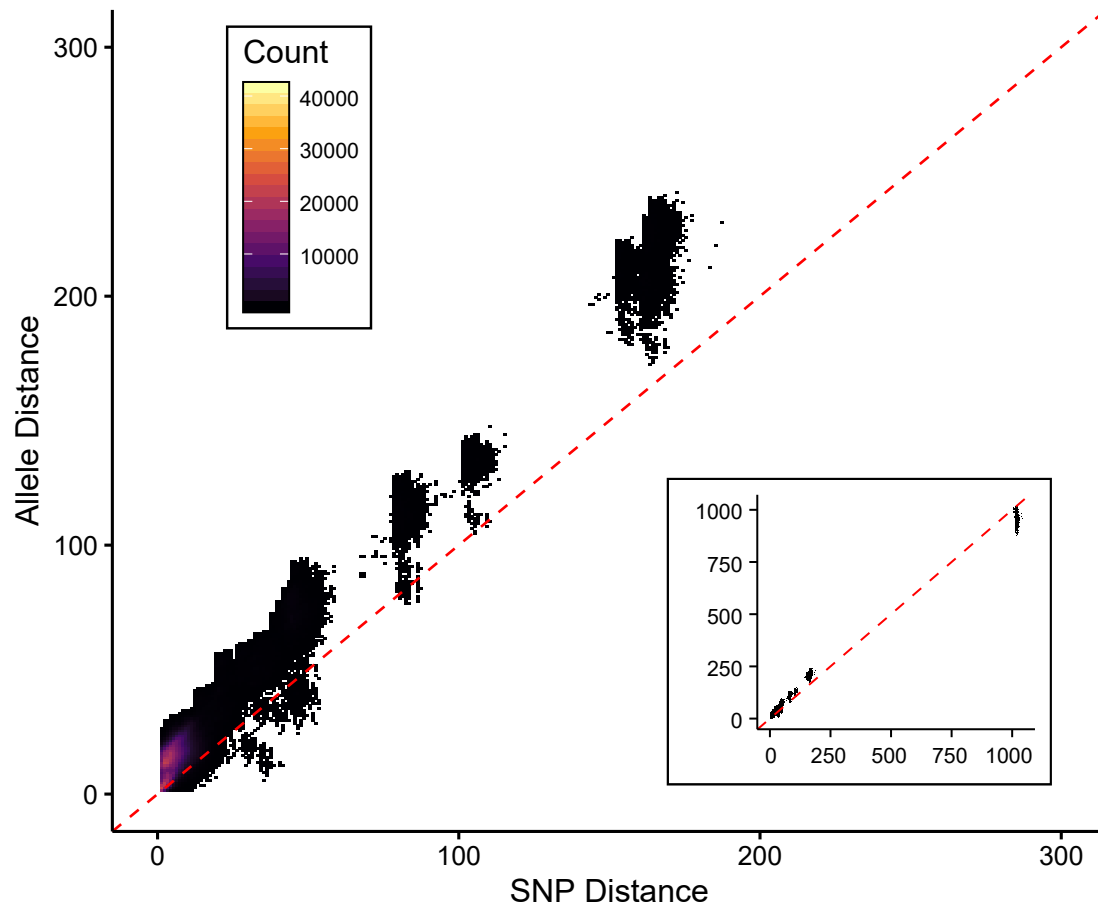

Figure 2.

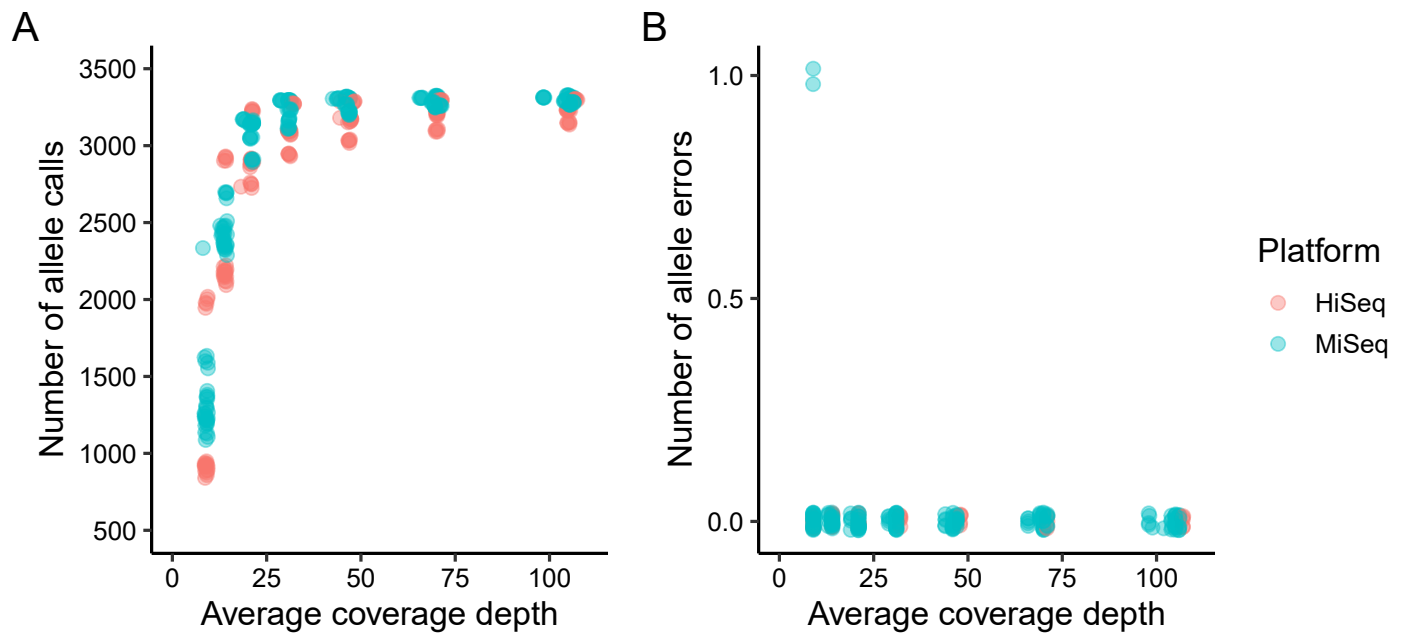

Figure 3.

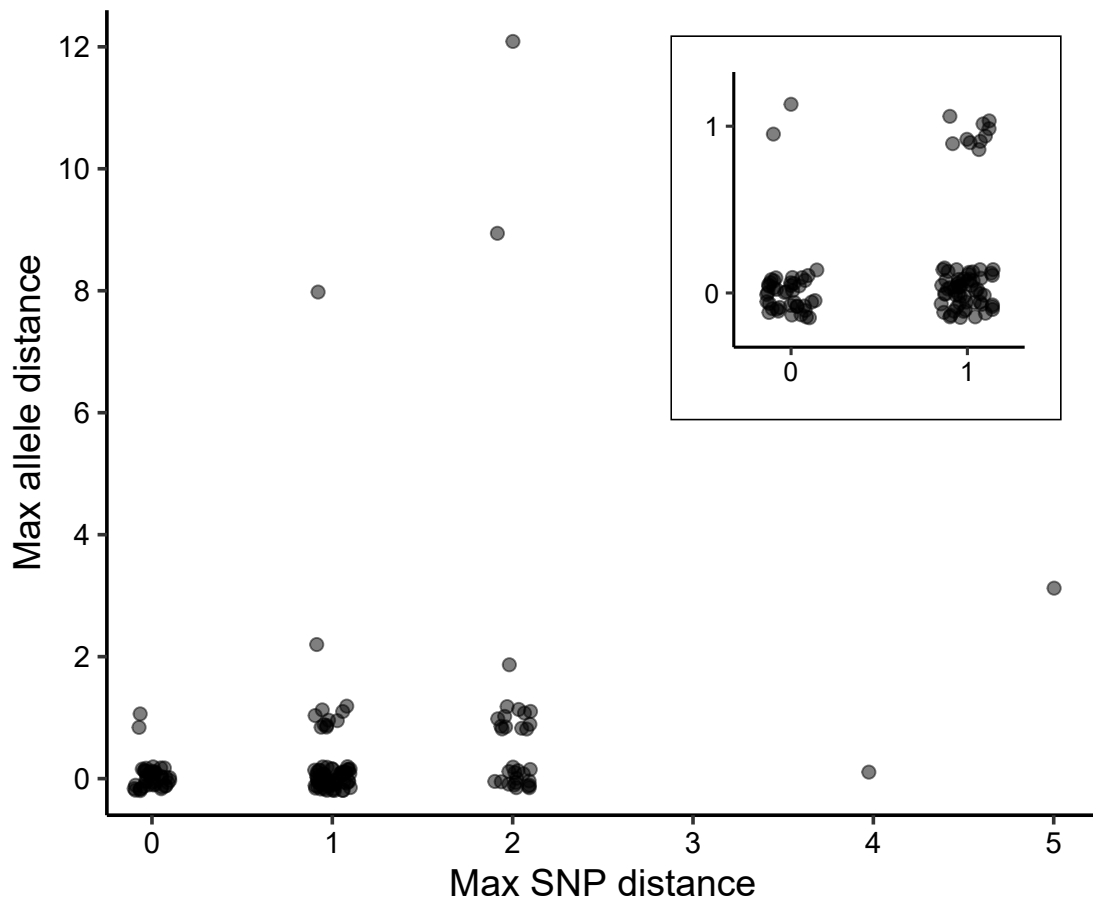

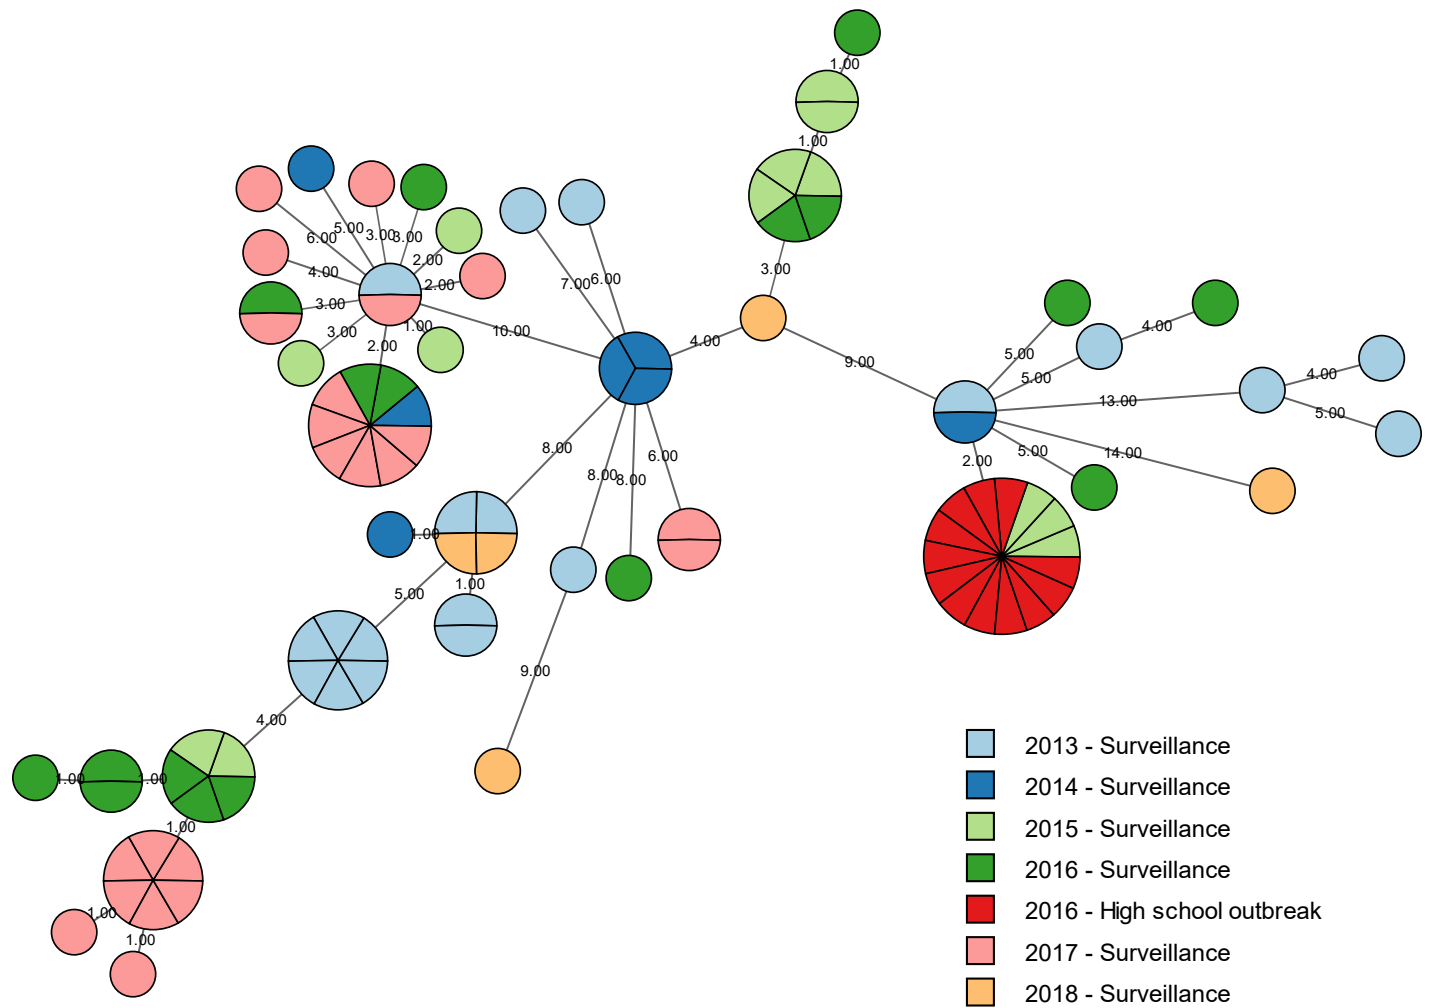

Figure 5.

A

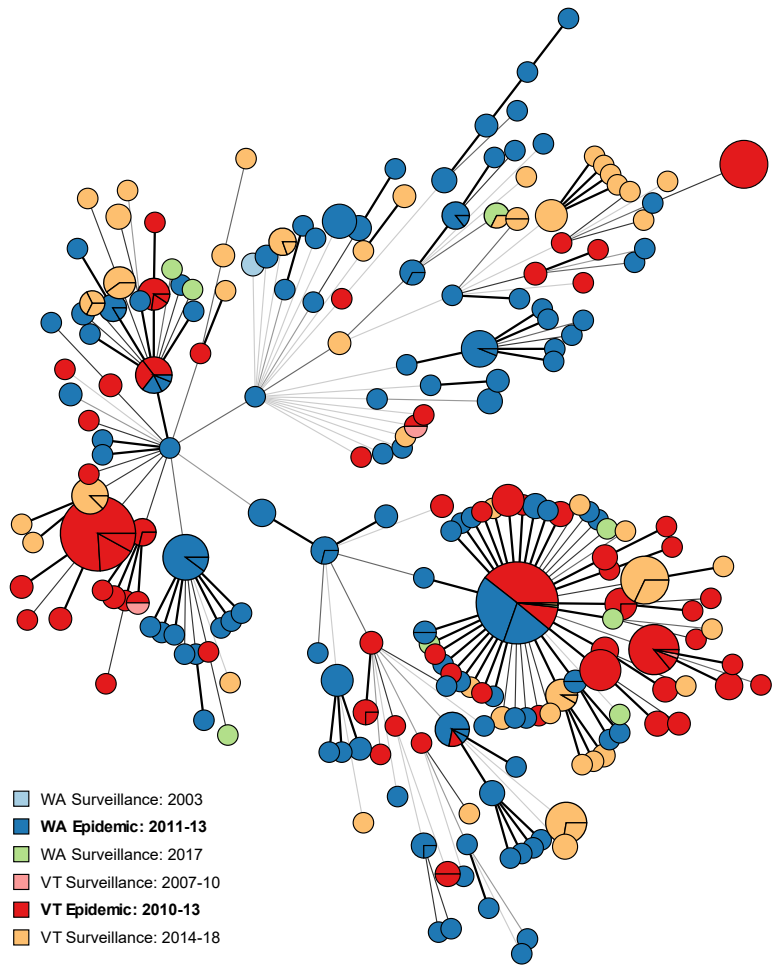

B

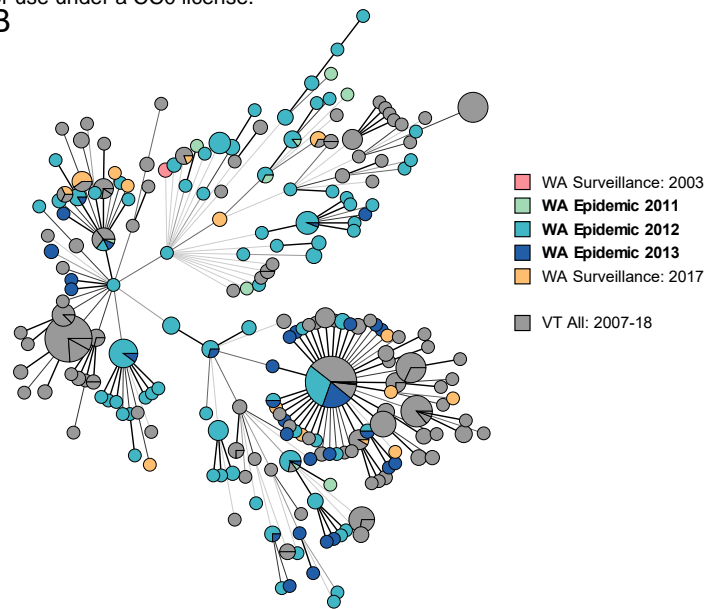

C

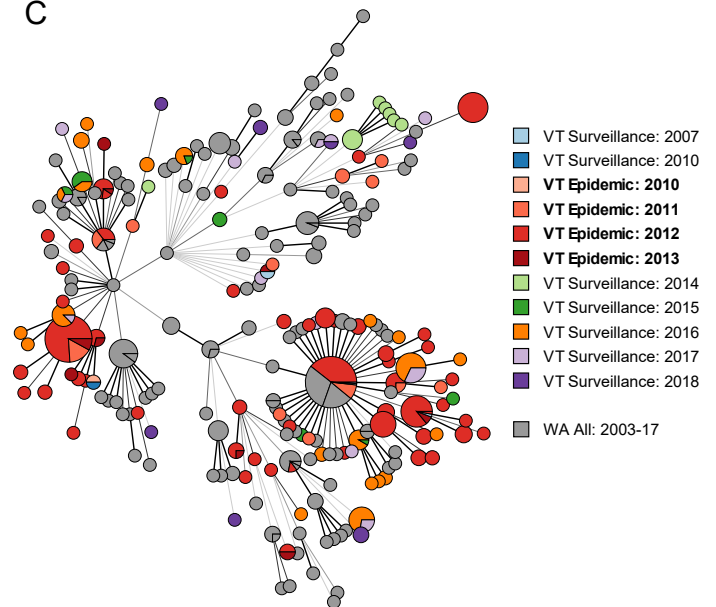

Figure 6.

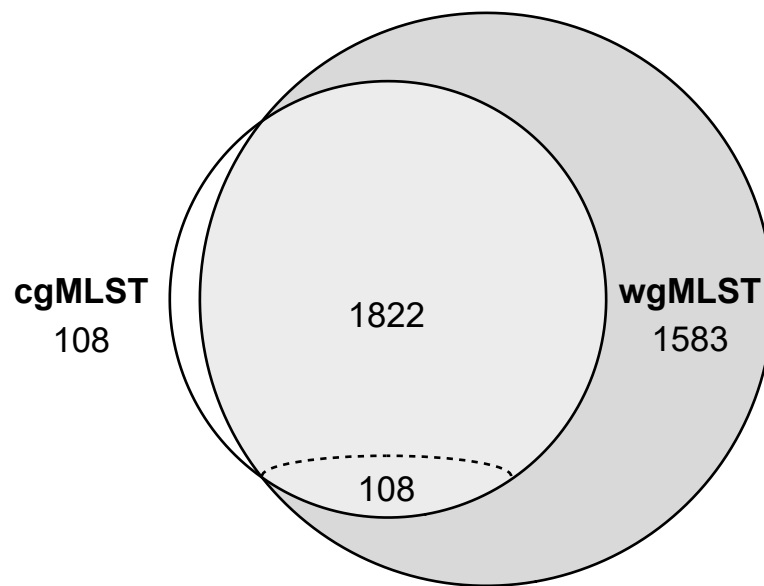

Figure 7.

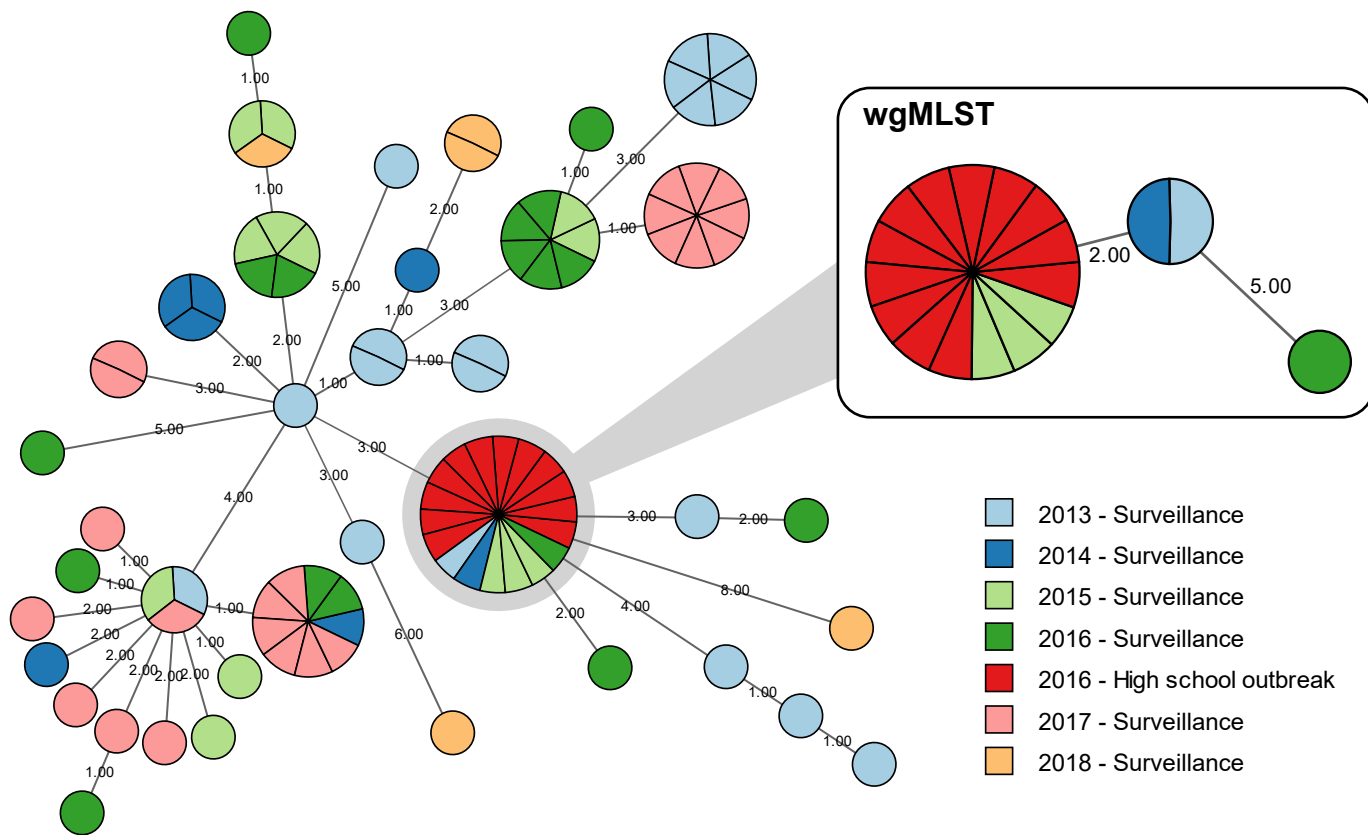

Figure 8.
